# Supplementary material for: Bone Marrow-Derived Mesenchymal Stem Cells Migrate toward Hormone-Insensitive Prostate Tumor Cells Expressing TGF-β via N-Cadherin
Source: MDPI journal article supplement (doi:10.3390/biomedicines9111572), 2021-10-29
Supplement: s1 [file s1]

# Bone marrow-derived mesenchymal stem cells migrate toward hormone-insensitive prostate tumor cells expressing TGF- $\beta$ via N-cadherin

Jinok Noh <sup>1</sup>, Jinyeong Yu <sup>2</sup>, Wootak Kim <sup>1</sup>, Aran Park <sup>2</sup> and Ki-Sook Park <sup>1,3,\*</sup>

<sup>1</sup> Department of Biomedical Science and Technology, Graduate School, Kyung Hee University, Seoul 02447, Korea; rjo8853@khu.ac.kr (J.N.); [kimwotak@khu.ac.kr](mailto:kimwotak@khu.ac.kr) (W.K.)

<sup>2</sup> Graduate School of Biotechnology, Kyung Hee University, Yongin 17104, Korea; jinyeong90@khu.ac.kr (J.Y.); arvi2114@khu.ac.kr (A.P.)

<sup>3</sup> East-West Medical Research Institute, Kyung Hee University, Seoul 02447, Korea; kisookpark@khu.ac.kr (K.-S.P.)

\* Correspondence: kisookpark@khu.ac.kr; Tel.: +82-2-958-9368 (K.-S.P.)

**Supplementary Figure S1.** The measurement of the number and the length of N-cadherin-positive structures at the borders between BM-MSCs and the width of N-cadherin-positive borders between BM-MSCs.

**Supplementary Figure S2.** The expression of TGF- $\beta$ 1 ligand in prostate cancers.

**Supplementary Figure S3.** Expression of TGF- $\beta$  ligands (TGF- $\beta$ 1, TGF- $\beta$ 2, and TGF- $\beta$ 3) in PC3, DU145, and LNCaP prostate tumor cells.

**Supplementary Figure S4:** Full unedited blots of Figure 2.

**Supplementary Figure S5.** Verification of siRNA-mediated knockdown of TGF- $\beta$  type 1 receptor.

**Supplementary Figure S6:** Full unedited blots of Figure 4.

**Supplementary Figure S7.** Verification of siRNA-mediated knockdown of N-cadherin.

**Supplementary Figure S8.** Representative images used for analysis of Figure 6H and I.

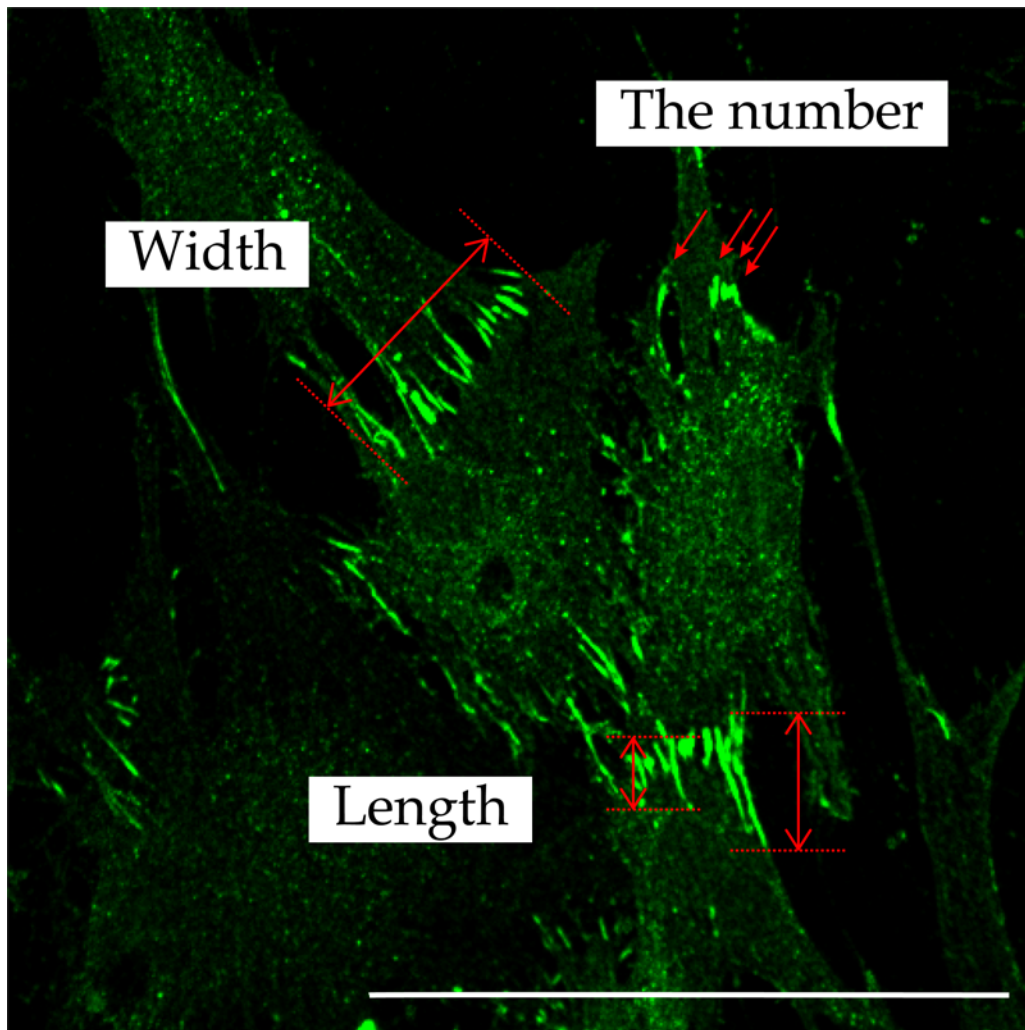

**Supplementary Figure S1.** The measurement of the number and the length of N-cadherin-positive structures at the borders between BM-MSCs and the width of N-cadherin-positive borders between BM-MSCs. N-cadherin was stained in green and scale bar indicates 100  $\mu\text{m}$ .

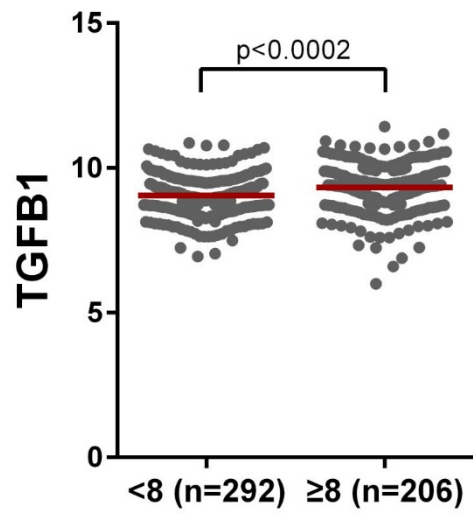

**Supplementary Figure S2.** The expression of TGF- $\beta$ 1 ligand in prostate cancers. The RNA-seq database of human prostate cancers from The Cancer Genome Atlas (TCGA) was analyzed. There were 292 samples with a Gleason score of under 8 and 206 with a Gleason score of higher or equal to 8. The red lines indicate the mean values.

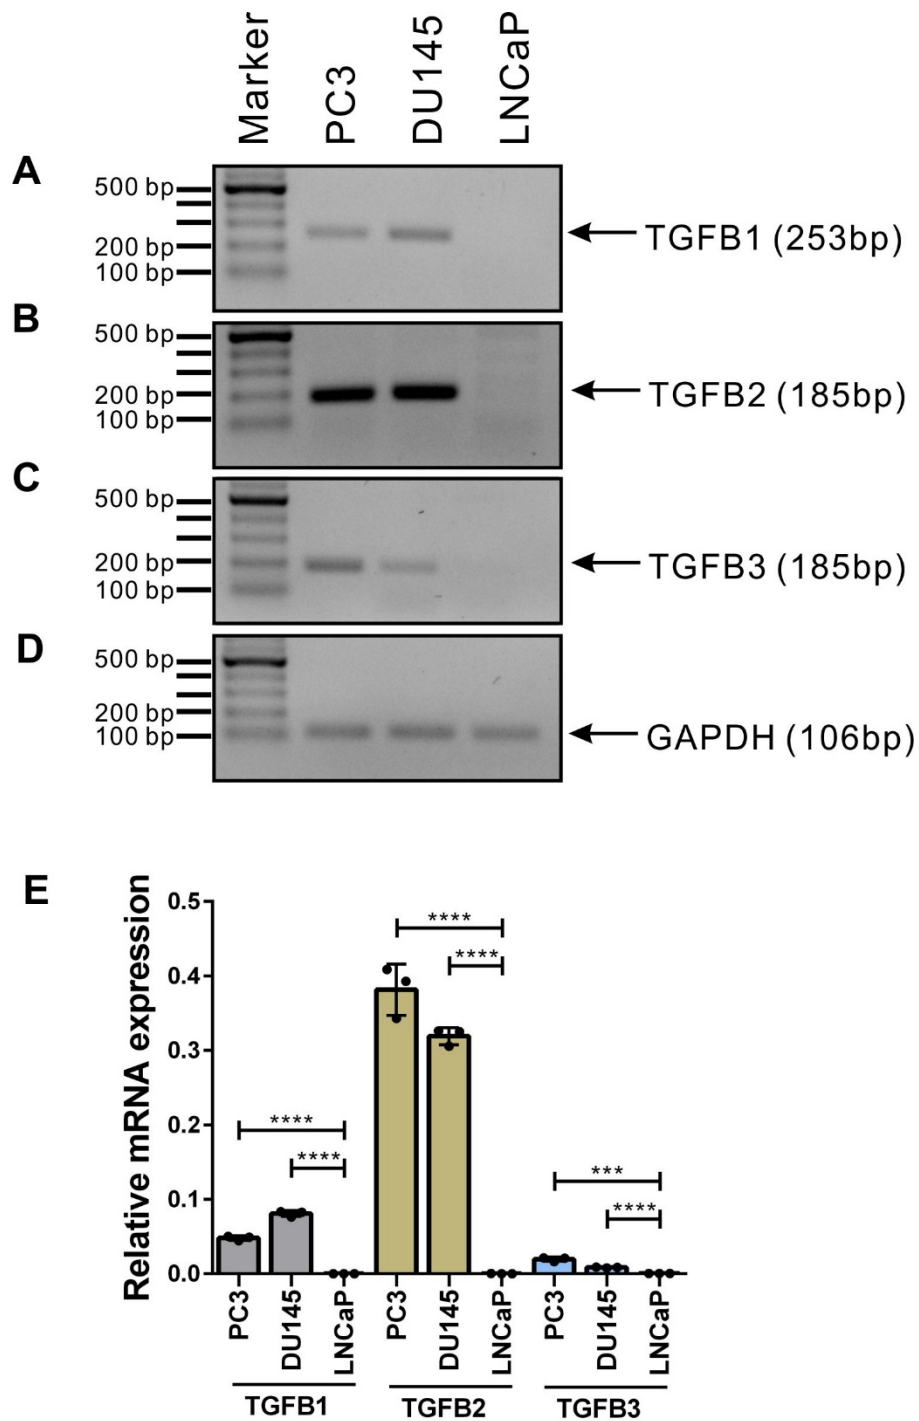

**Supplementary Figure S3.** Expression of TGF- $\beta$  ligands (TGF- $\beta$ 1, TGF- $\beta$ 2, and TGF- $\beta$ 3) in PC3, DU145, and LNCaP prostate tumor cells. Semi-quantitative RT-PCR analysis of TGF- $\beta$ 1 (TGFB1, **A**), TGF- $\beta$ 2 (TGFB2, **B**), and TGF- $\beta$ 3 (TGFB3, **C**) in PC3, DU145, and LNCaP. Glyceraldehyde 3-phosphate dehydrogenase gene (GAPDH, **D**) was used as an endogenous control for semi-quantitative RT-PCR analysis. Quantitative RT-PCR (qRT-PCR) analysis of TGFB1, TGFB2, and TGFB3 in PC3, DU145, and LNCaP (**E**). p Value obtained by t-test (\*\*,  $p \leq 0.001$ ; \*\*\*\*,  $p \leq 0.0001$ ). Ribosomal protein S9 gene (RPS9) was used as an endogenous control for qRT-PCR analysis.

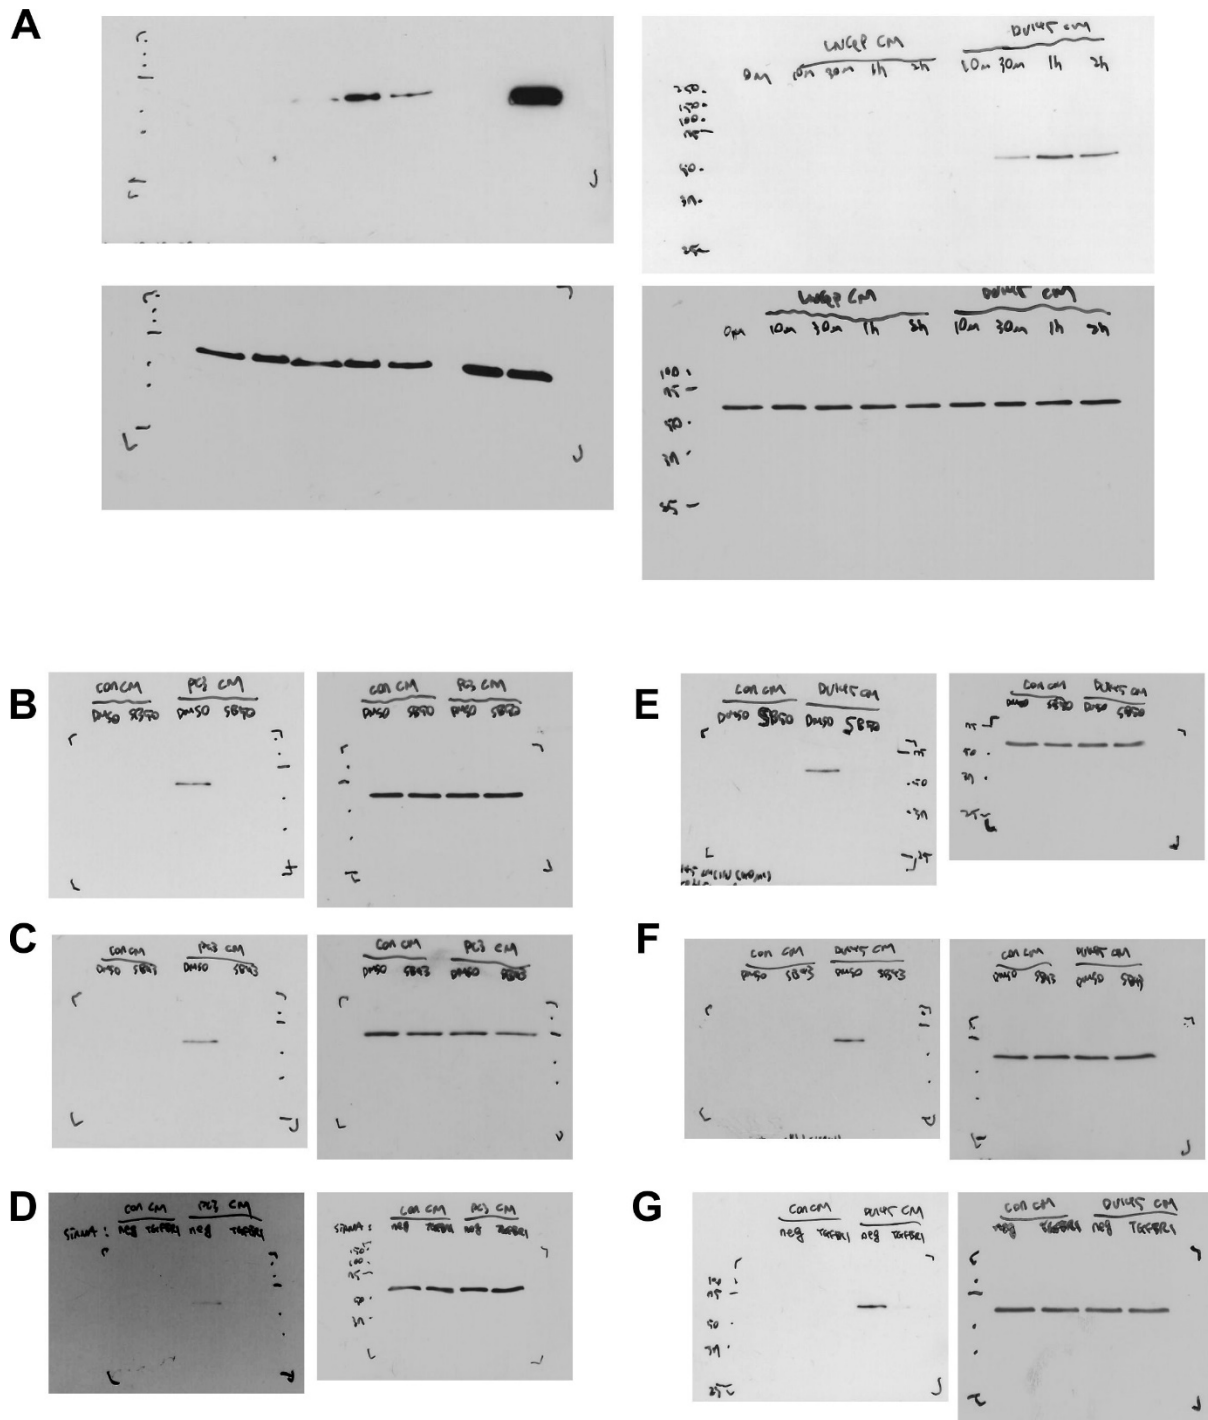

**Supplementary Figure S4:** Full unedited blots of Figure 2. (A) Full unedited blots for pSmad2/3 and Smad2 of Figure 2A. (B) Full unedited blots for pSmad2/3 and Smad2 of Figure 2B. (C) Full unedited blots for pSmad2/3 and Smad2 of Figure 2C. (D) Full unedited blots for pSmad2/3 and Smad2 of Figure 2D. (E) Full unedited blots for pSmad2/3 and Smad2 of Figure 2E. (F) Full unedited blots for pSmad2/3 and Smad2 of Figure 2F. (G) Full unedited blots for pSmad2/3 and Smad2 of Figure 2G.

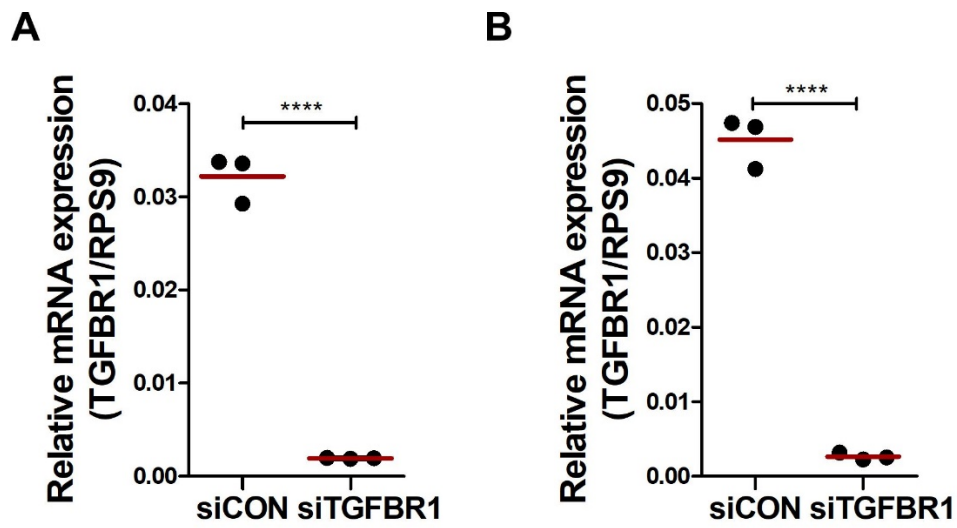

**Supplementary Figure S5.** Verification of siRNA-mediated knockdown of TGF- $\beta$  type 1 receptor. qRT-PCR analysis of TGF- $\beta$  type 1 receptor (TGFBR1). BM-MSCs were transfected with control siRNA (siCON) or TGF- $\beta$  type 1 receptor siRNA (siTGFBR1) prior to treatment with PC3 conditioned medium (**A**) or DU145 conditioned medium (**B**). Ribosomal protein S9 gene (RPS9) was used as an endogenous control.

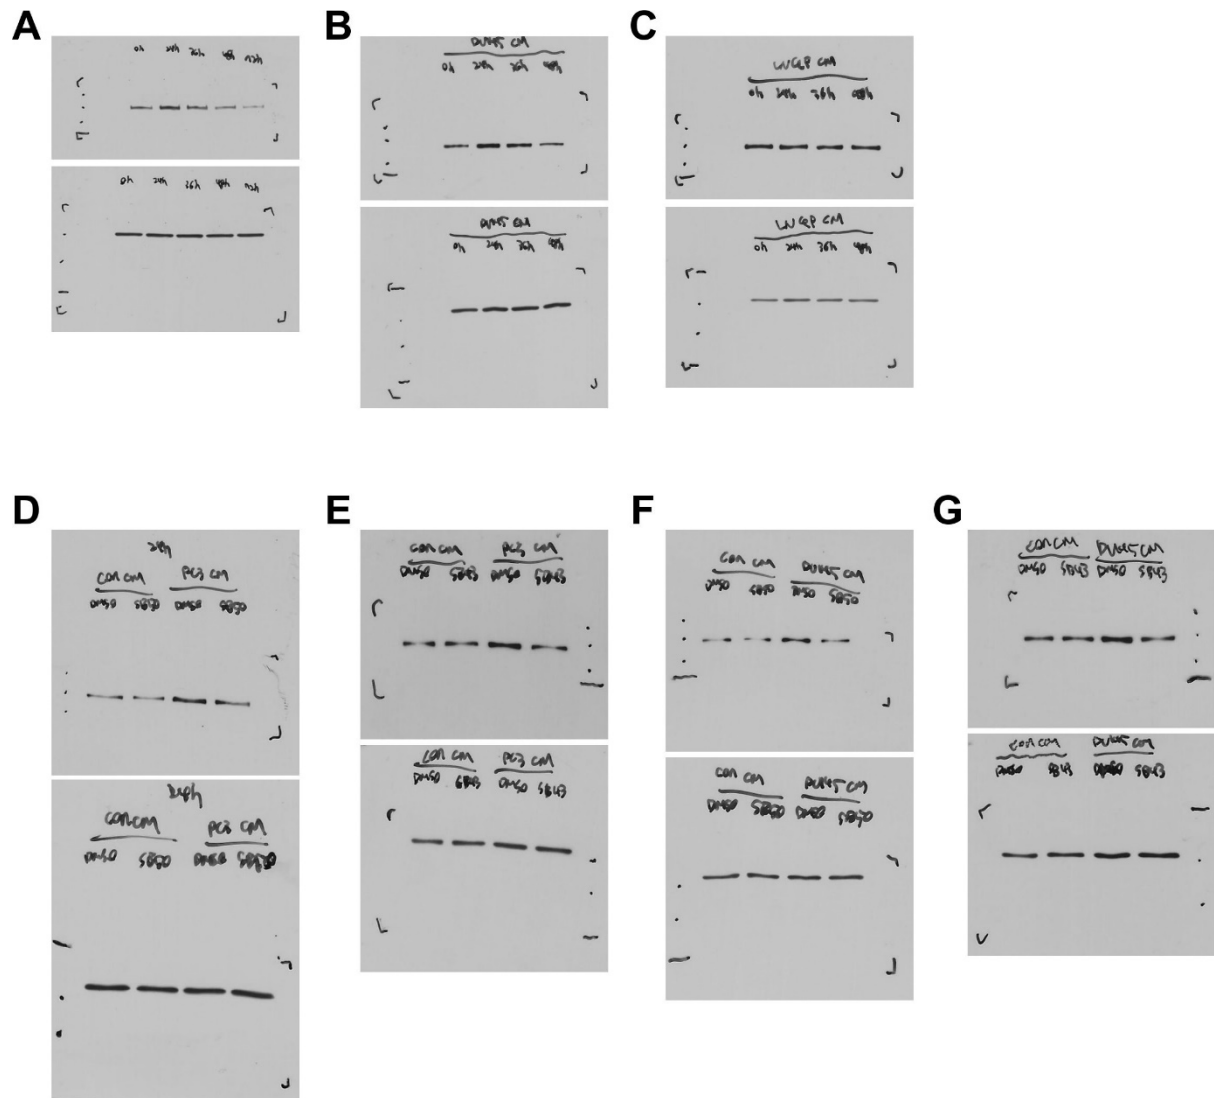

**Supplementary Figure S6:** Full unedited blots of Figure 4. (A) Full unedited blots for N-cadherin (N-cad) and α-tubulin (α-Tub) of Figure 4A. (B) Full unedited blots for N-cadherin (N-cad) and α-tubulin (α-Tub) of Figure 4C. (C) Full unedited blots for N-cadherin (N-cad) and α-tubulin (α-Tub) of Figure 4E. (D) Full unedited blots for N-cadherin (N-cad) and α-tubulin (α-Tub) of Figure 4L. (E) Full unedited blots for N-cadherin (N-cad) and α-tubulin (α-Tub) of Figure 4M. (F) Full unedited blots for N-cadherin (N-cad) and α-tubulin (α-Tub) of Figure 4N. (G) Full unedited blots for N-cadherin (N-cad) and α-tubulin (α-Tub) of Figure 4O.

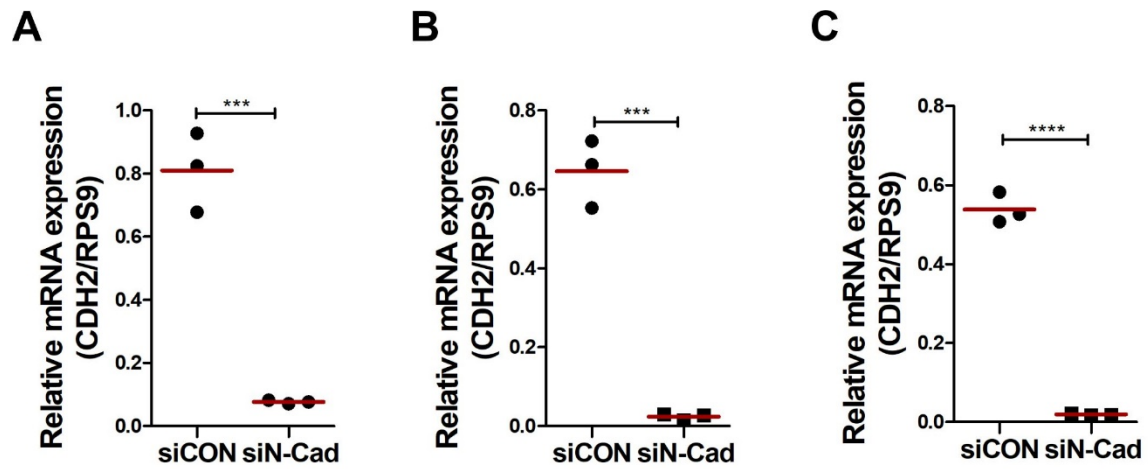

**Supplementary Figure S7.** Verification of siRNA-mediated knockdown of N-cadherin. qRT-PCR analysis of N-cadherin (CDH2). BM-MSCs were transfected with control siRNA (siCON) or N-cadherin siRNA (siN-Cad) prior to evaluating BM-MSCs migration in response to PC3 conditioned medium (**A**), DU145 conditioned medium (**B**) or LNCaP conditioned medium (**C**). Ribosomal protein S9 gene (RPS9) was used as an endogenous control.



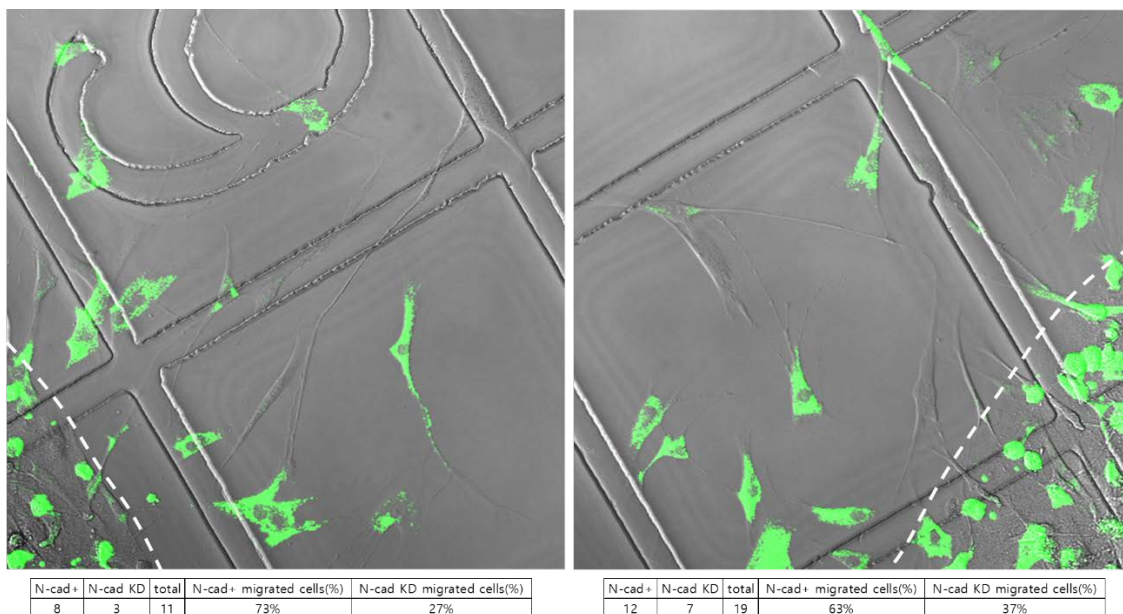

**Supplementary Figure S8.** Representative images used for analysis of Figure 6H and I. White broken lines indicate the margin of the collagen gel containing cells.
