# Supplementary material for: Bone Marrow-Derived Mesenchymal Stem Cells Migrate toward Hormone-Insensitive Prostate Tumor Cells Expressing TGF-β via N-Cadherin
Source: Biomedicines. 2021 Oct 29;9(11):1572. doi: 10.3390/biomedicines9111572 (PMC8615076; doi:10.3390/biomedicines9111572)
Supplement: Supplementary file 1 [file biomedicines-09-01572-s001.zip › Supplementary Materials/Supplementary table S1.xlsx]

## Sheet: patients(n=498)
Supplementary table S1. Gleason score and TGFB1 expression in prostate cancers (TCGA)
sample	gleason_score	TGFB1
TCGA-G9-7523-01	10	10.9112
TCGA-XK-AAIV-01	10	10.1546
TCGA-CH-5751-01	10	9.4477
TCGA-XQ-A8TA-01	10	7.5994
TCGA-J9-A52E-01	9	11.171
TCGA-V1-A9ZG-01	9	10.7792
TCGA-KK-A7B2-01	9	10.7434
TCGA-ZG-A9MC-01	9	10.7247
TCGA-J9-A52C-01	9	10.6892
TCGA-J9-A8CK-01	9	10.6464
TCGA-J9-A8CL-01	9	10.5571
TCGA-ZG-A9L2-01	9	10.5415
TCGA-ZG-A9L4-01	9	10.5387
TCGA-YL-A9WY-01	9	10.4972
TCGA-ZG-A9LS-01	9	10.488
TCGA-ZG-A9L9-01	9	10.4862
TCGA-HC-A4ZV-01	9	10.4776
TCGA-XJ-A9DI-01	9	10.4573
TCGA-YL-A8HJ-01	9	10.4439
TCGA-EJ-A7NM-01	9	10.3929
TCGA-HC-7081-01	9	10.3888
TCGA-J9-A52B-01	9	10.386
TCGA-KK-A8IC-01	9	10.3834
TCGA-ZG-A9LN-01	9	10.3795
TCGA-KK-A7B3-01	9	10.3765
TCGA-KK-A7B0-01	9	10.3572
TCGA-V1-A9Z8-01	9	10.2856
TCGA-J9-A8CM-01	9	10.2437
TCGA-KC-A4BV-01	9	10.2181
TCGA-EJ-A65B-01	9	10.214
TCGA-YL-A8SJ-01	9	10.1734
TCGA-KK-A8IL-01	9	10.1175
TCGA-KK-A8I7-01	9	10.0888
TCGA-ZG-A9L6-01	9	10.0855
TCGA-V1-A9Z7-01	9	10.0653
TCGA-YL-A8HK-01	9	10.0396
TCGA-HC-A9TE-01	9	10.0384
TCGA-HC-8264-01	9	10.0184
TCGA-V1-A9OA-01	9	10.0133
TCGA-V1-A8WW-01	9	9.9681
TCGA-KK-A8IB-01	9	9.9496
TCGA-ZG-A9L0-01	9	9.9436
TCGA-V1-A9O7-01	9	9.9376
TCGA-V1-A8WV-01	9	9.9311
TCGA-V1-A9ZI-01	9	9.9293
TCGA-XK-AAIW-01	9	9.9066
TCGA-EJ-5518-01	9	9.8917
TCGA-ZG-A9LB-01	9	9.8883
TCGA-XQ-A8TB-01	9	9.8825
TCGA-CH-5792-01	9	9.8767
TCGA-X4-A8KQ-01	9	9.865
TCGA-V1-A9Z9-01	9	9.8601
TCGA-CH-5754-01	9	9.849
TCGA-ZG-A9NI-01	9	9.8432
TCGA-ZG-A8QZ-01	9	9.8431
TCGA-HI-7168-01	9	9.7946
TCGA-ZG-A9LU-01	9	9.7685
TCGA-ZG-A9LY-01	9	9.7468
TCGA-HC-A632-01	9	9.7336
TCGA-YL-A8SO-01	9	9.7178
TCGA-VP-A878-01	9	9.7138
TCGA-VP-AA1N-01	9	9.6391
TCGA-V1-A9OL-01	9	9.618
TCGA-YL-A8SK-01	9	9.6162
TCGA-YL-A9WX-01	9	9.6051
TCGA-YL-A9WK-01	9	9.6032
TCGA-G9-6356-01	9	9.5707
TCGA-V1-A9O5-01	9	9.5704
TCGA-YL-A8SC-01	9	9.5455
TCGA-KK-A7B4-01	9	9.5356
TCGA-EJ-5524-01	9	9.5218
TCGA-VP-A87H-01	9	9.5039
TCGA-ZG-A8QW-01	9	9.4935
TCGA-ZG-A8QY-01	9	9.4853
TCGA-ZG-A9LM-01	9	9.4848
TCGA-FC-7961-01	9	9.4722
TCGA-EJ-A65F-01	9	9.4551
TCGA-YL-A9WH-01	9	9.4393
TCGA-KC-A4BR-01	9	9.4367
TCGA-HC-A631-01	9	9.4206
TCGA-KK-A59V-01	9	9.4199
TCGA-HC-7232-01	9	9.4181
TCGA-KK-A6E6-01	9	9.4132
TCGA-HC-A9TH-01	9	9.4122
TCGA-YL-A8SB-01	9	9.3967
TCGA-YL-A8SQ-01	9	9.3826
TCGA-EJ-5525-01	9	9.3775
TCGA-YL-A8S8-01	9	9.3629
TCGA-YL-A8SR-01	9	9.339
TCGA-KK-A5A1-01	9	9.3329
TCGA-XJ-A9DX-01	9	9.3167
TCGA-HC-7213-01	9	9.3063
TCGA-2A-A8W3-01	9	9.2716
TCGA-YL-A8SI-01	9	9.2283
TCGA-KK-A59X-01	9	9.1857
TCGA-2A-A8VT-01	9	9.1174
TCGA-ZG-A9LZ-01	9	9.093
TCGA-EJ-5514-01	9	9.0754
TCGA-V1-A9O5-06	9	9.0114
TCGA-EJ-A65J-01	9	9.0006
TCGA-CH-5761-01	9	8.9954
TCGA-ZG-A9M4-01	9	8.99
TCGA-KK-A6E7-01	9	8.9614
TCGA-VP-A879-01	9	8.9609
TCGA-CH-5741-01	9	8.9263
TCGA-CH-5769-01	9	8.8465
TCGA-J4-AATZ-01	9	8.8429
TCGA-ZG-A9ND-01	9	8.8112
TCGA-ZG-A9L5-01	9	8.8081
TCGA-HC-A8CY-01	9	8.7798
TCGA-YL-A8HL-01	9	8.76
TCGA-EJ-5507-01	9	8.7495
TCGA-YL-A9WI-01	9	8.723
TCGA-YL-A8HM-01	9	8.7199
TCGA-ZG-A9KY-01	9	8.7128
TCGA-YL-A9WL-01	9	8.6605
TCGA-KK-A6E1-01	9	8.6503
TCGA-YL-A8SP-01	9	8.6349
TCGA-HI-7171-01	9	8.6255
TCGA-G9-6499-01	9	8.6181
TCGA-G9-6367-01	9	8.5616
TCGA-ZG-A9L1-01	9	8.5239
TCGA-VP-A87D-01	9	8.5067
TCGA-YJ-A8SW-01	9	8.4831
TCGA-KK-A8I8-01	9	8.4039
TCGA-KK-A7AP-01	9	8.3904
TCGA-KK-A8IA-01	9	8.3767
TCGA-KK-A6E0-01	9	8.374
TCGA-KK-A59Y-01	9	8.3596
TCGA-ZG-A9N3-01	9	8.3425
TCGA-CH-5772-01	9	8.2765
TCGA-EJ-8469-01	9	8.2022
TCGA-KK-A8ID-01	9	8.0897
TCGA-KK-A8II-01	9	8.0774
TCGA-CH-5753-01	9	8.0001
TCGA-KK-A6E8-01	9	7.9423
TCGA-KK-A7AU-01	9	7.8458
TCGA-KK-A8IK-01	9	7.7402
TCGA-MG-AAMC-01	9	7.6178
TCGA-FC-A5OB-01	9	7.2447
TCGA-YL-A8S9-01	9	6.8861
TCGA-J9-A52D-01	9	6.6013
TCGA-4L-AA1F-01	8	11.4276
TCGA-VN-A88I-01	8	10.9257
TCGA-VP-A872-01	8	10.7803
TCGA-YL-A8SF-01	8	10.5584
TCGA-HC-7821-01	8	10.4463
TCGA-J4-A6G1-01	8	10.3915
TCGA-KK-A8I9-01	8	10.3587
TCGA-V1-A9ZR-01	8	10.3064
TCGA-G9-7510-01	8	9.9686
TCGA-J4-A6G3-01	8	9.9254
TCGA-V1-A9O9-01	8	9.9135
TCGA-VN-A88K-01	8	9.7907
TCGA-EJ-5495-01	8	9.772
TCGA-EJ-A46G-01	8	9.7431
TCGA-HC-8266-01	8	9.6639
TCGA-EJ-A8FU-01	8	9.6107
TCGA-EJ-A8FP-01	8	9.5889
TCGA-XJ-A9DK-01	8	9.5456
TCGA-V1-A9OH-01	8	9.5395
TCGA-G9-7521-01	8	9.5377
TCGA-EJ-A46E-01	8	9.4778
TCGA-YL-A9WJ-01	8	9.4645
TCGA-SU-A7E7-01	8	9.4117
TCGA-CH-5752-01	8	9.4037
TCGA-V1-A9ZK-01	8	9.3659
TCGA-EJ-A6RA-01	8	9.3626
TCGA-VN-A88R-01	8	9.3576
TCGA-V1-A9OX-01	8	9.3396
TCGA-EJ-5503-01	8	9.3202
TCGA-EJ-8468-01	8	9.2748
TCGA-EJ-5526-01	8	9.2173
TCGA-EJ-7782-01	8	9.201
TCGA-XK-AAIR-01	8	9.1827
TCGA-VP-A87B-01	8	9.1614
TCGA-EJ-8474-01	8	9.1298
TCGA-XK-AAJ3-01	8	9.1187
TCGA-EJ-A46D-01	8	9.1016
TCGA-EJ-5519-01	8	9.072
TCGA-M7-A722-01	8	8.9795
TCGA-EJ-8472-01	8	8.8564
TCGA-HC-A48F-01	8	8.7539
TCGA-EJ-A7NJ-01	8	8.7322
TCGA-HC-8265-01	8	8.7032
TCGA-EJ-A46B-01	8	8.6948
TCGA-G9-A9S0-01	8	8.6939
TCGA-Y6-A9XI-01	8	8.619
TCGA-VN-A88Q-01	8	8.5791
TCGA-EJ-A46F-01	8	8.5489
TCGA-WW-A8ZI-01	8	8.53
TCGA-EJ-5506-01	8	8.4619
TCGA-YL-A8SL-01	8	8.4092
TCGA-HC-8262-01	8	8.3381
TCGA-G9-A9S4-01	8	8.2817
TCGA-VP-A87K-01	8	8.2237
TCGA-HC-7819-01	8	8.2235
TCGA-YL-A8SA-01	8	8.142
TCGA-G9-A9S7-01	8	8.0492
TCGA-M7-A724-01	8	8.0077
TCGA-EJ-A65D-01	8	7.9771
TCGA-2A-A8VX-01	8	7.8119
TCGA-EJ-A65G-01	8	7.5943
TCGA-VP-A876-01	8	7.3288
TCGA-FC-A4JI-01	8	7.2557
TCGA-VN-A943-01	8	6.0031
TCGA-VP-A87C-01	7	10.8615
TCGA-KK-A8I4-01	7	10.7827
TCGA-HC-7079-01	7	10.7773
TCGA-M7-A71Z-01	7	10.6956
TCGA-TK-A8OK-01	7	10.6496
TCGA-J4-A67M-01	7	10.6342
TCGA-EJ-A46H-01	7	10.5874
TCGA-EJ-7315-01	7	10.5234
TCGA-HC-A76W-01	7	10.5063
TCGA-HC-A6AS-01	7	10.4846
TCGA-M7-A723-01	7	10.4355
TCGA-FC-7708-01	7	10.2446
TCGA-G9-6379-01	7	10.2348
TCGA-EJ-7328-01	7	10.1751
TCGA-CH-5771-01	7	10.1667
TCGA-HC-7745-01	7	10.1563
TCGA-KK-A7AV-01	7	10.1393
TCGA-YL-A8HO-01	7	10.1267
TCGA-V1-A8MU-01	7	10.1233
TCGA-HC-7210-01	7	10.108
TCGA-KK-A7AQ-01	7	10.0607
TCGA-KK-A8IG-01	7	9.9828
TCGA-EJ-7327-01	7	9.9738
TCGA-J9-A8CP-01	7	9.9505
TCGA-KK-A59Z-01	7	9.9317
TCGA-CH-5744-01	7	9.9308
TCGA-KK-A7B1-01	7	9.923
TCGA-HC-A6AP-01	7	9.8939
TCGA-J4-A67R-01	7	9.877
TCGA-HC-7737-01	7	9.8769
TCGA-J4-A67L-01	7	9.8731
TCGA-HC-A6AN-01	7	9.8721
TCGA-V1-A8MJ-01	7	9.8709
TCGA-HC-7817-01	7	9.8497
TCGA-V1-A8MG-01	7	9.8353
TCGA-HC-7233-01	7	9.7943
TCGA-M7-A71Y-01	7	9.778
TCGA-V1-A9OY-01	7	9.774
TCGA-G9-6338-01	7	9.7629
TCGA-V1-A8MM-01	7	9.7427
TCGA-HC-A6HX-01	7	9.7272
TCGA-TP-A8TT-01	7	9.7003
TCGA-G9-6348-01	7	9.6936
TCGA-FC-A66V-01	7	9.6929
TCGA-M7-A721-01	7	9.6757
TCGA-HC-7740-01	7	9.6687
TCGA-CH-5745-01	7	9.6415
TCGA-KC-A4BL-01	7	9.6387
TCGA-G9-6333-01	7	9.6382
TCGA-EJ-7792-01	7	9.6263
TCGA-HC-A8D0-01	7	9.6247
TCGA-EJ-7318-01	7	9.6144
TCGA-HI-7169-01	7	9.6063
TCGA-XK-AAJT-01	7	9.6041
TCGA-KC-A7FE-01	7	9.5931
TCGA-EJ-A6RC-01	7	9.5716
TCGA-XK-AAJR-01	7	9.565
TCGA-EJ-5527-01	7	9.5644
TCGA-EJ-7325-01	7	9.5629
TCGA-J4-A67N-01	7	9.5603
TCGA-CH-5743-01	7	9.5601
TCGA-J4-A83I-01	7	9.5431
TCGA-HC-A6AL-01	7	9.5279
TCGA-G9-6329-01	7	9.5207
TCGA-KK-A8IM-01	7	9.5187
TCGA-VN-A88L-01	7	9.5186
TCGA-EJ-5509-01	7	9.5174
TCGA-J4-A67K-01	7	9.5073
TCGA-G9-6498-01	7	9.5065
TCGA-G9-6370-01	7	9.4994
TCGA-HC-A8D1-01	7	9.496
TCGA-EJ-7791-01	7	9.4934
TCGA-VN-A88P-01	7	9.4921
TCGA-EJ-7115-01	7	9.4862
TCGA-KK-A7AY-01	7	9.4736
TCGA-EJ-A7NH-01	7	9.4718
TCGA-V1-A8ML-01	7	9.459
TCGA-G9-6377-01	7	9.4505
TCGA-V1-A8WL-01	7	9.4399
TCGA-J4-A67O-01	7	9.4255
TCGA-HC-7078-01	7	9.4237
TCGA-HC-7747-01	7	9.3925
TCGA-J4-A83M-01	7	9.3715
TCGA-G9-6365-01	7	9.3557
TCGA-KC-A7F6-01	7	9.3497
TCGA-KK-A6E3-01	7	9.3497
TCGA-G9-7522-01	7	9.3385
TCGA-G9-6361-01	7	9.3384
TCGA-G9-7525-01	7	9.3381
TCGA-EJ-8470-01	7	9.3373
TCGA-HC-7736-01	7	9.3352
TCGA-EJ-5501-01	7	9.3329
TCGA-G9-6364-01	7	9.3317
TCGA-CH-5739-01	7	9.315
TCGA-EJ-5502-01	7	9.315
TCGA-EJ-5498-01	7	9.2909
TCGA-EJ-5516-01	7	9.2795
TCGA-EJ-A7NN-01	7	9.2724
TCGA-G9-6353-01	7	9.2485
TCGA-CH-5791-01	7	9.2301
TCGA-KK-A7AW-01	7	9.2269
TCGA-HC-7749-01	7	9.2155
TCGA-J4-A67S-01	7	9.2095
TCGA-G9-6496-01	7	9.203
TCGA-J4-A67T-01	7	9.1933
TCGA-EJ-A7NG-01	7	9.1827
TCGA-KK-A8I6-01	7	9.1755
TCGA-EJ-7125-01	7	9.174
TCGA-EJ-7330-01	7	9.1684
TCGA-EJ-5494-01	7	9.167
TCGA-G9-6336-01	7	9.1666
TCGA-G9-6384-01	7	9.1648
TCGA-HC-7231-01	7	9.1561
TCGA-EJ-7794-01	7	9.1516
TCGA-KK-A7AZ-01	7	9.1509
TCGA-QU-A6IM-01	7	9.1467
TCGA-YL-A8SH-01	7	9.1202
TCGA-EJ-7331-01	7	9.1134
TCGA-XJ-A83F-01	7	9.1101
TCGA-EJ-5531-01	7	9.1096
TCGA-EJ-7312-01	7	9.1065
TCGA-EJ-A7NK-01	7	9.0807
TCGA-KK-A8IH-01	7	9.0773
TCGA-KK-A8I5-01	7	9.0638
TCGA-HC-7742-01	7	9.0419
TCGA-XK-AAJU-01	7	9.0363
TCGA-XK-AAJP-01	7	9.0328
TCGA-EJ-7785-01	7	9.0262
TCGA-EJ-7788-01	7	9.0181
TCGA-EJ-5499-01	7	9.0153
TCGA-HC-7750-01	7	9.0051
TCGA-HC-A6AO-01	7	9.005
TCGA-KK-A6E5-01	7	9.0015
TCGA-XJ-A83H-01	7	8.9991
TCGA-VP-A87J-01	7	8.9985
TCGA-EJ-5510-01	7	8.9965
TCGA-HC-7752-01	7	8.993
TCGA-EJ-5521-01	7	8.9803
TCGA-HC-A6AQ-01	7	8.9786
TCGA-KC-A7F3-01	7	8.9736
TCGA-XA-A8JR-01	7	8.9733
TCGA-HC-8216-01	7	8.9602
TCGA-V1-A8X3-01	7	8.9569
TCGA-EJ-A8FO-01	7	8.9553
TCGA-EJ-5504-01	7	8.9498
TCGA-EJ-7783-01	7	8.9091
TCGA-J4-A83J-01	7	8.9089
TCGA-EJ-A8FN-01	7	8.8999
TCGA-HC-8261-01	7	8.8877
TCGA-G9-6366-01	7	8.8758
TCGA-EJ-7781-01	7	8.8698
TCGA-HC-7212-01	7	8.8578
TCGA-EJ-5522-01	7	8.8475
TCGA-HC-8257-01	7	8.8168
TCGA-EJ-5542-01	7	8.8014
TCGA-H9-7775-01	7	8.7936
TCGA-KK-A8IJ-01	7	8.7904
TCGA-G9-6378-01	7	8.7822
TCGA-EJ-A65E-01	7	8.7762
TCGA-HC-7818-01	7	8.7747
TCGA-CH-5762-01	7	8.7674
TCGA-G9-6373-01	7	8.7521
TCGA-EJ-A46I-01	7	8.7462
TCGA-G9-6339-01	7	8.7336
TCGA-EJ-7314-01	7	8.7292
TCGA-XJ-A83G-01	7	8.7245
TCGA-EJ-5530-01	7	8.7241
TCGA-KC-A7FA-01	7	8.7214
TCGA-EJ-7123-01	7	8.7178
TCGA-G9-6343-01	7	8.7077
TCGA-KK-A6DY-01	7	8.7044
TCGA-XK-AAJA-01	7	8.7043
TCGA-HC-7080-01	7	8.7011
TCGA-EJ-5508-01	7	8.6967
TCGA-G9-6494-01	7	8.6942
TCGA-CH-5789-01	7	8.6932
TCGA-G9-7519-01	7	8.6879
TCGA-J4-8200-01	7	8.6699
TCGA-EJ-5497-01	7	8.666
TCGA-CH-5764-01	7	8.6572
TCGA-CH-5763-01	7	8.6486
TCGA-HC-8260-01	7	8.6481
TCGA-J4-8198-01	7	8.6401
TCGA-VN-A88N-01	7	8.6399
TCGA-M7-A725-01	7	8.6154
TCGA-J4-A83L-01	7	8.6037
TCGA-CH-5740-01	7	8.5969
TCGA-G9-6385-01	7	8.5778
TCGA-VN-A88M-01	7	8.576
TCGA-EJ-7797-01	7	8.5741
TCGA-J4-A83N-01	7	8.5703
TCGA-TP-A8TV-01	7	8.5543
TCGA-CH-5794-01	7	8.5421
TCGA-KK-A6E2-01	7	8.5175
TCGA-CH-5766-01	7	8.5111
TCGA-EJ-5511-01	7	8.5052
TCGA-X4-A8KS-01	7	8.5049
TCGA-VN-A88O-01	7	8.4979
TCGA-KC-A7FD-01	7	8.4909
TCGA-HC-7820-01	7	8.4884
TCGA-HC-7211-01	7	8.4855
TCGA-CH-5750-01	7	8.4509
TCGA-EJ-7784-01	7	8.432
TCGA-HC-A6HY-01	7	8.4297
TCGA-KK-A6E4-01	7	8.4086
TCGA-KC-A7F5-01	7	8.3972
TCGA-EJ-7793-01	7	8.3931
TCGA-EJ-7317-01	7	8.3907
TCGA-QU-A6IL-01	7	8.3851
TCGA-XK-AAK1-01	7	8.3784
TCGA-EJ-5532-01	7	8.3742
TCGA-G9-6351-01	7	8.3547
TCGA-G9-6362-01	7	8.3492
TCGA-EJ-7786-01	7	8.3478
TCGA-HC-7738-01	7	8.332
TCGA-CH-5737-01	7	8.2959
TCGA-FC-A6HD-01	7	8.2874
TCGA-EJ-7218-01	7	8.2655
TCGA-G9-6332-01	7	8.2558
TCGA-G9-6369-01	7	8.1751
TCGA-CH-5790-01	7	8.1491
TCGA-J4-A6M7-01	7	8.1345
TCGA-H9-A6BY-01	7	8.1253
TCGA-2A-AAYF-01	7	8.1198
TCGA-EJ-7789-01	7	8.0843
TCGA-QU-A6IN-01	7	8.0826
TCGA-G9-6354-01	7	8.071
TCGA-KC-A4BN-01	7	8.0657
TCGA-G9-6363-01	7	8.0393
TCGA-HC-A76X-01	7	8.0321
TCGA-HC-7744-01	7	8.0243
TCGA-KK-A8IF-01	7	7.9836
TCGA-EJ-5515-01	7	7.9757
TCGA-CH-5746-01	7	7.9682
TCGA-VP-A875-01	7	7.9568
TCGA-EJ-5505-01	7	7.9362
TCGA-CH-5788-01	7	7.8392
TCGA-EJ-A7NF-01	7	7.8241
TCGA-EJ-5512-01	7	7.7979
TCGA-CH-5767-01	7	7.7255
TCGA-CH-5748-01	7	7.7223
TCGA-HC-8256-01	7	7.6877
TCGA-EJ-A8FS-01	7	7.6393
TCGA-CH-5765-01	7	7.6344
TCGA-EJ-5496-01	7	7.6317
TCGA-HC-7230-01	7	7.4926
TCGA-2A-A8W1-01	7	6.9405
TCGA-EJ-AB20-01	6	10.4422
TCGA-HI-7170-01	6	10.4315
TCGA-H9-A6BX-01	6	9.8931
TCGA-G9-6347-01	6	9.8923
TCGA-J4-A67Q-01	6	9.7622
TCGA-J4-AATV-01	6	9.6656
TCGA-V1-A8MF-01	6	9.5776
TCGA-CH-5738-01	6	9.5564
TCGA-VP-A87E-01	6	9.5521
TCGA-HC-7748-01	6	9.5447
TCGA-2A-AAYO-01	6	9.4491
TCGA-XJ-A9DQ-01	6	9.3175
TCGA-QU-A6IO-01	6	9.3144
TCGA-J4-A83K-01	6	9.2518
TCGA-V1-A8MK-01	6	9.1929
TCGA-FC-A8O0-01	6	9.1829
TCGA-HC-7209-01	6	9.1204
TCGA-EJ-A65M-01	6	9.0455
TCGA-EJ-AB27-01	6	9.0132
TCGA-2A-A8VV-01	6	8.9964
TCGA-M7-A720-01	6	8.9235
TCGA-V1-A9OQ-01	6	8.8745
TCGA-HC-8258-01	6	8.869
TCGA-QU-A6IP-01	6	8.8258
TCGA-V1-A8WN-01	6	8.8036
TCGA-G9-7509-01	6	8.7659
TCGA-V1-A9OT-01	6	8.7252
TCGA-Y6-A8TL-01	6	8.7242
TCGA-V1-A8WS-01	6	8.7188
TCGA-J4-AAU2-01	6	8.7037
TCGA-2A-A8VL-01	6	8.6952
TCGA-G9-6342-01	6	8.6695
TCGA-2A-A8VO-01	6	8.6621
TCGA-J9-A8CN-01	6	8.6495
TCGA-ZG-A8QX-01	6	8.642
TCGA-V1-A9OF-01	6	8.4791
TCGA-EJ-5517-01	6	8.4764
TCGA-EJ-7321-01	6	8.3605
TCGA-2A-AAYU-01	6	8.3223
TCGA-CH-5768-01	6	8.0712
TCGA-G9-6371-01	6	7.8866
TCGA-HC-7075-01	6	7.864
TCGA-HC-7077-01	6	7.6233
TCGA-HC-8259-01	6	7.2402
TCGA-HC-8213-01	6	7.0417
